# Supplementary material
Source: MDPI journal article supplement (https://www.mdpi.com/2624-862X/4/4/48)
Supplement: s1 [file s1]

Archive with 1 entries (1 files):
- dairy-2710062-supplementary.pdf
